# Supplementary material
Source: HighWire-hosted journal article supplement (https://www.cmaj.ca/highwire/filestream/59301/field_highwire_adjunct_files/0/14-1435-1-at.pdf)
Supplement: 14-1435-1-at.pdf [file 14-1435-1-at.pdf]

## **Appendix 1 (as supplied by the author): Physician resources**

- Bhavnagri SJ, Mohammed TH. When and how to image a suspected broken rib. *Cleve Clin J Med* 2009;76:309-14.
- Gralow JR, Biermann S, Farooki A, et al. NCCN Task Force Report: bone health in cancer care. *J Natl Compr Canc Netw* 2013;11 Suppl 3:S1-50.
- National Comprehensive Cancer Network clinical practice guidelines in oncology. Breast cancer. Available: [www.nccn.org/professionals/physician\\_gls/f\\_guidelines.asp#breast](http://www.nccn.org/professionals/physician_gls/f_guidelines.asp#breast)
- Stubblefield MD. Radiation fibrosis syndrome: neuromuscular and musculoskeletal complications in cancer survivors. *PMR* 2011;3:1041-54.
- Yi A, Kim HH, Shin HJ, et al. Radiation-induced complications after breast cancer radiation therapy: a pictorial review of multimodality imaging findings. *Korean J Radiol* 2009;10:496-507.
